# Supplementary material
Source: publisher figshare collection journal article supplement (https://acs.figshare.com/ndownloader/files/26173236)
Supplement: Supplementary file 1 [file 26173236]

# **Supporting Information**

## **Cobalt Porphyrizine Supported on SnO<sub>2</sub> with Oxygen Vacancies for Boosting Photocatalytic Aerobic Oxidation of Glucose to Organic Acids in an Aqueous Medium**

Quanquan Zhang, Changjun Yang,\* Bingguang Zhang, and Kejian Deng

Key Laboratory of Catalysis and Energy Materials Chemistry of Ministry of Education & Hubei Key Laboratory of Catalysis and Materials Science, School of Chemistry and Materials Science, South-Central University for Nationalities, Wuhan, Hubei Province 430074, China

Corresponding author: Changjun Yang

E-mail: yangchangjun@mail.scuec.edu.cn

Number of pages: 7

Number of figures: 10

### **Preparation of SnO<sub>2</sub>-OVs/H<sub>2</sub>O<sub>2</sub>**

According to the literature,<sup>1</sup> a typical fabrication procedure for SnO<sub>2</sub>-OVs/H<sub>2</sub>O<sub>2</sub> composite was as follow: 200 mg of SnO<sub>2</sub>-OVs was dispersed into 20 mL of deionized water under magnetic stirring, and then 5 mL of hydrogen peroxide (H<sub>2</sub>O<sub>2</sub>, 30% aqueous) was added dropwise into the above suspension solution. After that, the mixture was continuously stirred for 10 h in the dark in ambient temperature. The resultant precipitate was collected by filtration and washed with deionized water, and then dried at 80°C overnight. This sample was denoted as SnO<sub>2</sub>-OVs/H<sub>2</sub>O<sub>2</sub>.

### **Preparation of SnO<sub>2</sub>-OVs/H<sub>2</sub>O<sub>2</sub>/CoPz**

In a typical fabrication procedure for SnO<sub>2</sub>-OVs/H<sub>2</sub>O<sub>2</sub>/CoPz composite, a solution of CoPz in dichloromethane was firstly prepared by dissolving 40 mg of CoPz into 50 mL of dichloromethane. Subsequently, 100 mg of SnO<sub>2</sub>-OVs/H<sub>2</sub>O<sub>2</sub> was dispersed into the 10 mL of dichloromethane under magnetic stirring, and then 0.625 mL of the as-prepared solution of CoPz in dichloromethane was added dropwise into the above suspension solution. After that, the mixture was continuously stirred for 12 h in ambient temperature. The resulting composite was obtained through removing the solvent by reduced pressure distillation. The CoPz content in the composite was about 0.5%, this sample was denoted as SnO<sub>2</sub>-OVs/H<sub>2</sub>O<sub>2</sub>/CoPz (0.5%).

### **Absorption Measurements**

The photocatalyst (20 mg) was immersed into 30 mL of the mixed solution containing glucose (0.06 mmol), glucaric acid (0.06 mmol), gluconic acid (0.06 mmol) and formic acid (0.06 mmol). The suspension system was stirred for 24 h in the dark in ambient temperature, then the filtered solution was used to analyze.

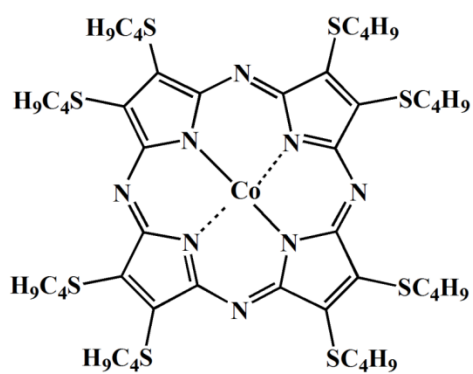

**Figure S1.** Molecular structure of CoPz.

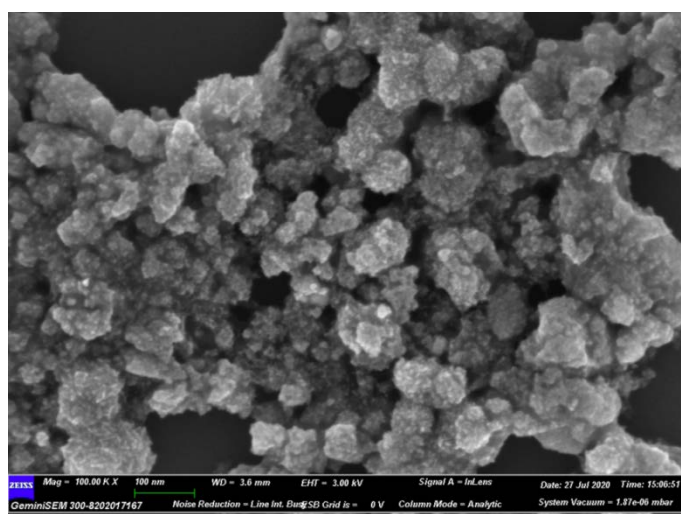

**Figure S2.** SEM of SnO<sub>2</sub>-OVs.

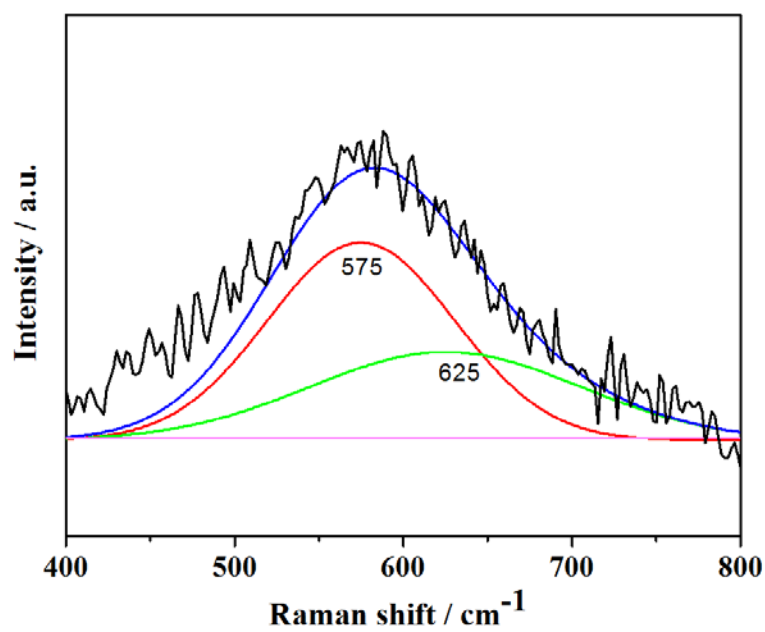

**Figure S3.** Raman spectra of SnO<sub>2</sub>-OVs in the 400-800 cm<sup>-1</sup> region.

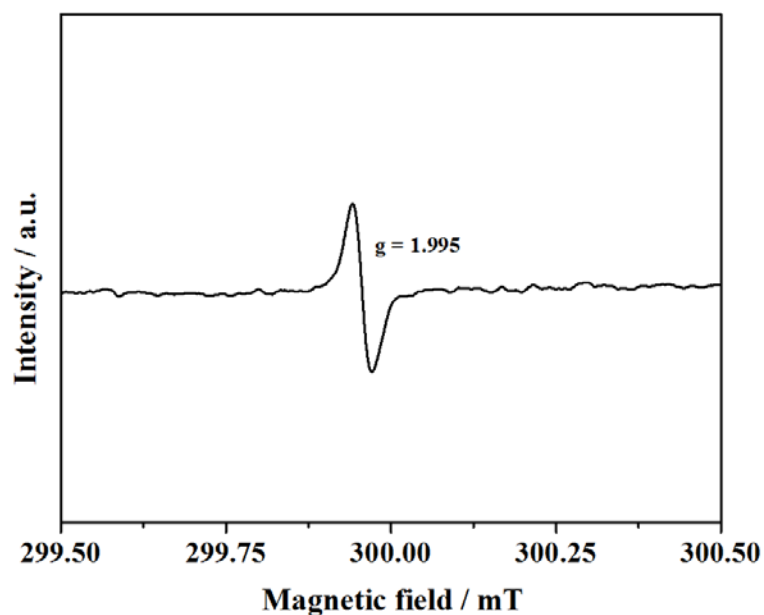

**Figure S4.** ESR spectrum of SnO<sub>2</sub>-OVs.

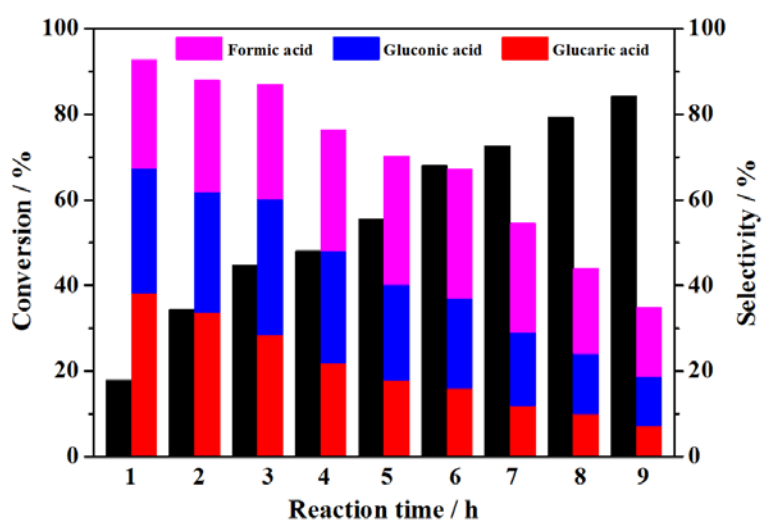

**Figure S5.** Conversion and selectivity results for oxidizing glucose to organic acids versus reaction time in presence of SnO<sub>2</sub>-OVs/CoPz(0.5%). Reaction conditions: 30 mL of aqueous glucose (2 mmol·L<sup>-1</sup>), 20 mg of SnO<sub>2</sub>-OVs/CoPz(0.5%) composite, light intensity of 1.5 W·cm<sup>-2</sup>. (Note: black bar and color bar represent the glucose conversion and the selectivity of organic acid, respectively.)

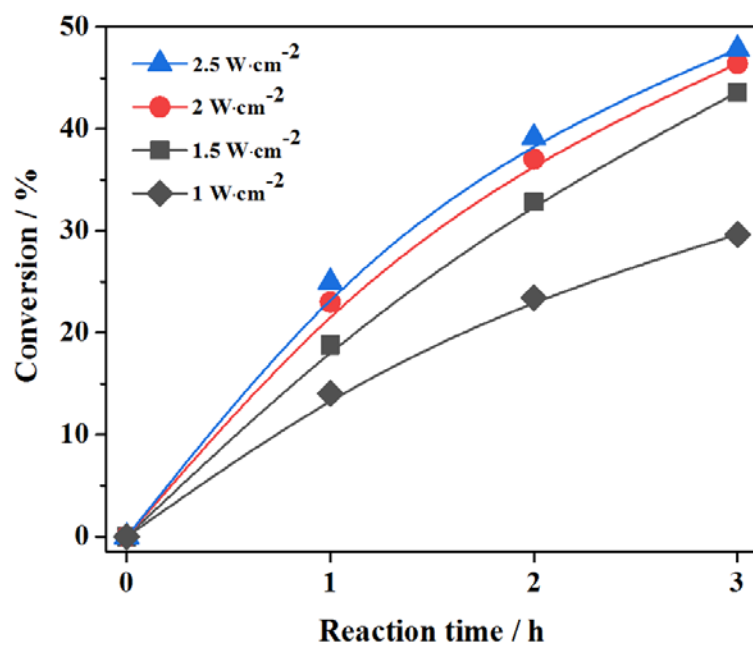

**Figure S6.** The effect of light intensity on the glucose conversion. Reaction conditions: 30 mL of aqueous glucose ( $2 \text{ mmol} \cdot \text{L}^{-1}$ ), 20 mg of  $\text{SnO}_2\text{-OVs/CoPz}(0.5\%)$  composite.

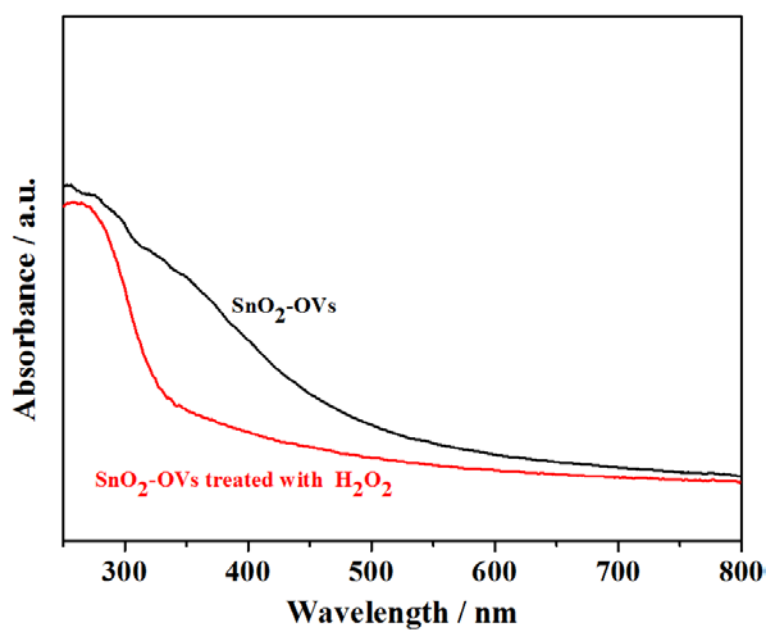

**Figure S7.** The UV-vis DRS of  $\text{SnO}_2\text{-OVs}$  treated by  $\text{H}_2\text{O}_2$ .

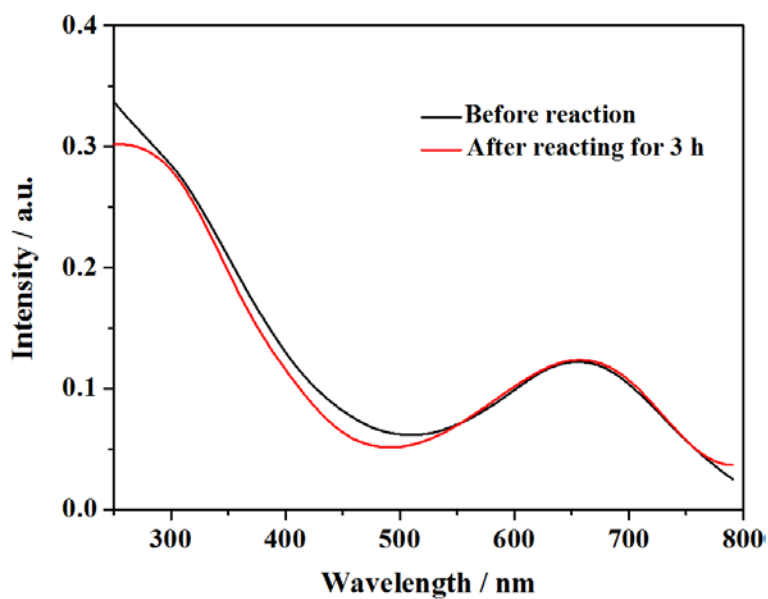

**Figure S8.** The UV-vis DRS of SnO<sub>2</sub>-OVs/CoPz(0.5%) composite before the reaction and after reacting for 3 h.

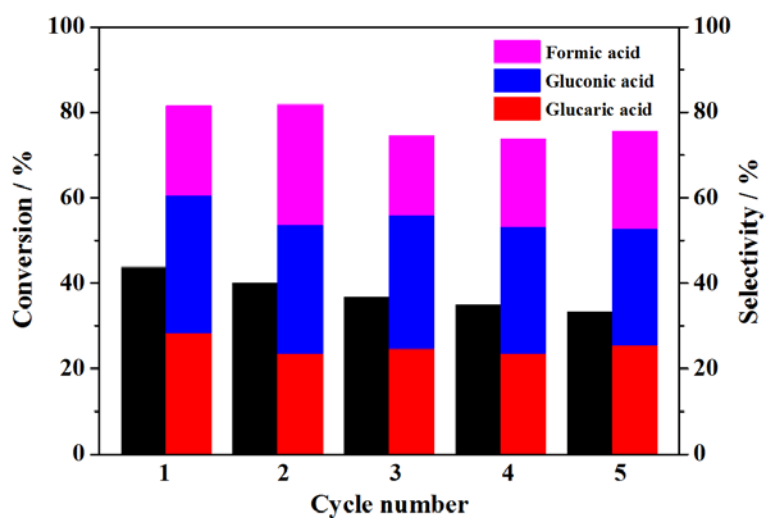

**Figure S9.** Reusability of SnO<sub>2</sub>-OVs/CoPz(0.5%) composite for oxidizing glucose to organic acids. Reaction conditions: 30 mL of aqueous glucose (2 mmol·L<sup>-1</sup>), 20 mg of SnO<sub>2</sub>-OVs/CoPz(0.5%) composite, reacting for 3 h, light intensity of 1.5 W·cm<sup>-2</sup>. (Note: black bar and color bar represent the glucose conversion and the selectivity of organic acid, respectively.)

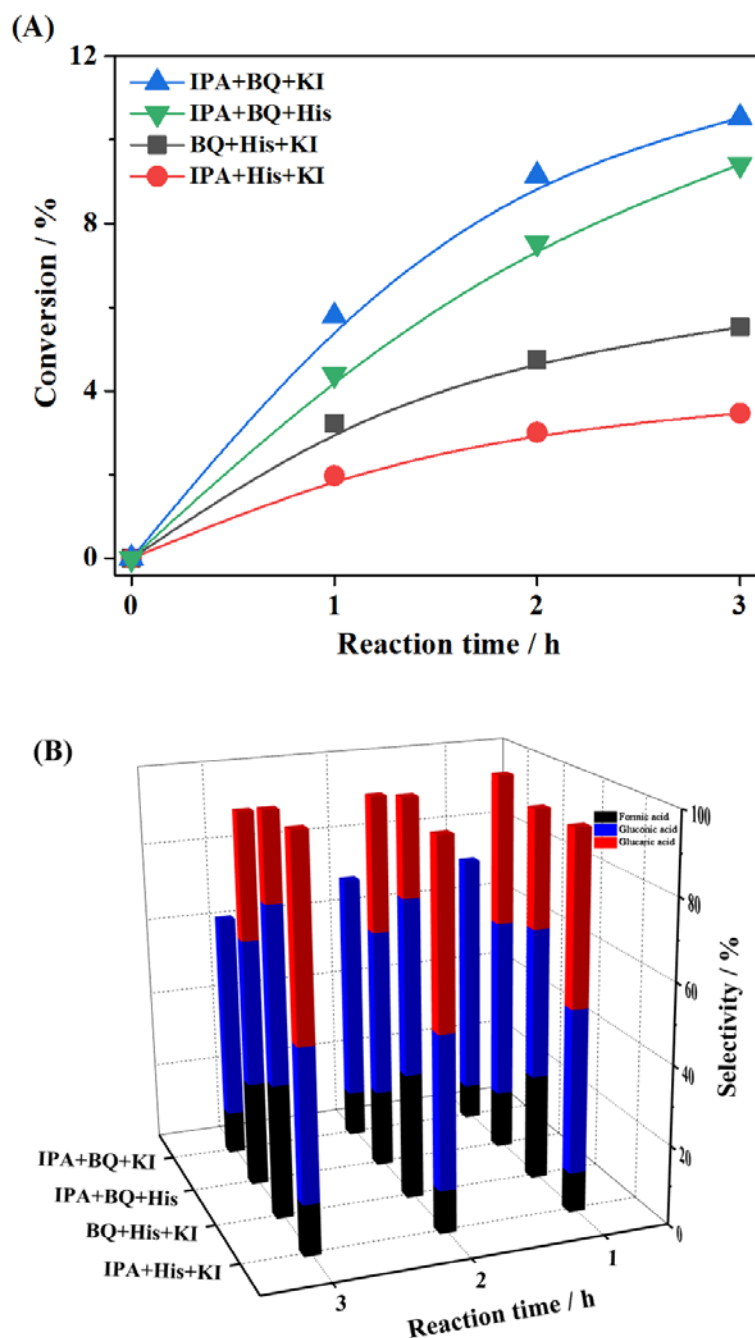

**Figure S10.** Conversion (A) and selectivity (B) results for oxidizing glucose to organic acids under the condition of adding three kinds of scavengers at the same time in the  $\text{SnO}_2\text{-OVs/CoPz}(0.5\%)$  photocatalytic system. Reaction conditions: 30 mL of aqueous glucose ( $2 \text{ mmol}\cdot\text{L}^{-1}$ ), 20 mg of  $\text{SnO}_2\text{-OVs/CoPz}(0.5\%)$  composite, light intensity of  $1.5 \text{ W}\cdot\text{cm}^{-2}$ . IPA ( $13.3 \text{ mmol}\cdot\text{L}^{-1}$ ), KI ( $13.3 \text{ mmol}\cdot\text{L}^{-1}$ ), BQ ( $13.3 \text{ mmol}\cdot\text{L}^{-1}$ ), His ( $13.3 \text{ mmol}\cdot\text{L}^{-1}$ ).

## References

- (1) Xiao, C.; Zhang, L.; Hao, H.; Wang, W. High Selective Oxidation of Benzyl Alcohol to Benzylaldehyde and Benzoic Acid with Surface Oxygen Vacancies on  $\text{W}_{18}\text{O}_{49}$ /Holey Ultrathin  $\text{g-C}_3\text{N}_4$  Nanosheets. *ACS Sustainable Chem. Eng.* **2019**, 7, 7268-7276.
